# Supplementary material for: Oxidative Stress Signaling in Blast TBI-Induced Tau Phosphorylation
Source: MDPI journal article supplement (doi:10.3390/antiox10060955), 2021-06-15

## **Oxidative stress signaling in blast TBI-induced tau Phosphorylation**

**Chunyu Wang 1,2, Changjuan Shao 2, Li Zhang 2, 3, Sandra L. Siedlak 2, James S. Meabon 4,5, Elaine R. Peskind 4,5,  
Yubing Lu 2, Wenzhang Wang 2, George Perry 6, David G. Cook 4,5,7 and Xiongwei Zhu 2,\***

1 Department of Neurology, the second Xiangya Hospital, Central South University, Changsha, Hunan, People's Republic of China; wangchunyu@csu.edu.cn

2 Department of Pathology, Case Western Reserve University, Cleveland, OH, USA; cxs708@case.edu, yubing.lu@case.edu; sls7@case.edu, wenzhang.wang@case.edu, xiongwei.zhu@case.edu

3 Department of Endocrinology and Metabolism, Huashan Hospital, Fudan University, Shanghai, People's Republic of China; lenzhangli@hotmail.com,

4 VA Puget Sound Health Care System, Seattle, WA, USA; James64@uw.edu, peskind@uw.edu, dgcook@uw.edu

5 Department of Psychiatry and Behavioral Sciences, University of Washington, WA, USA

6 Department of Biology, College of Science, University of Texas at San Antonio, San Antonio, Texas, USA; george.perry@utsa.edu

7 Departments of Medicine and Pharmacology, University of Washington, WAQ, USA

\* Correspondence: xiongwei.zhu@case.edu; Tel.: +1-216-368-5903

Actin

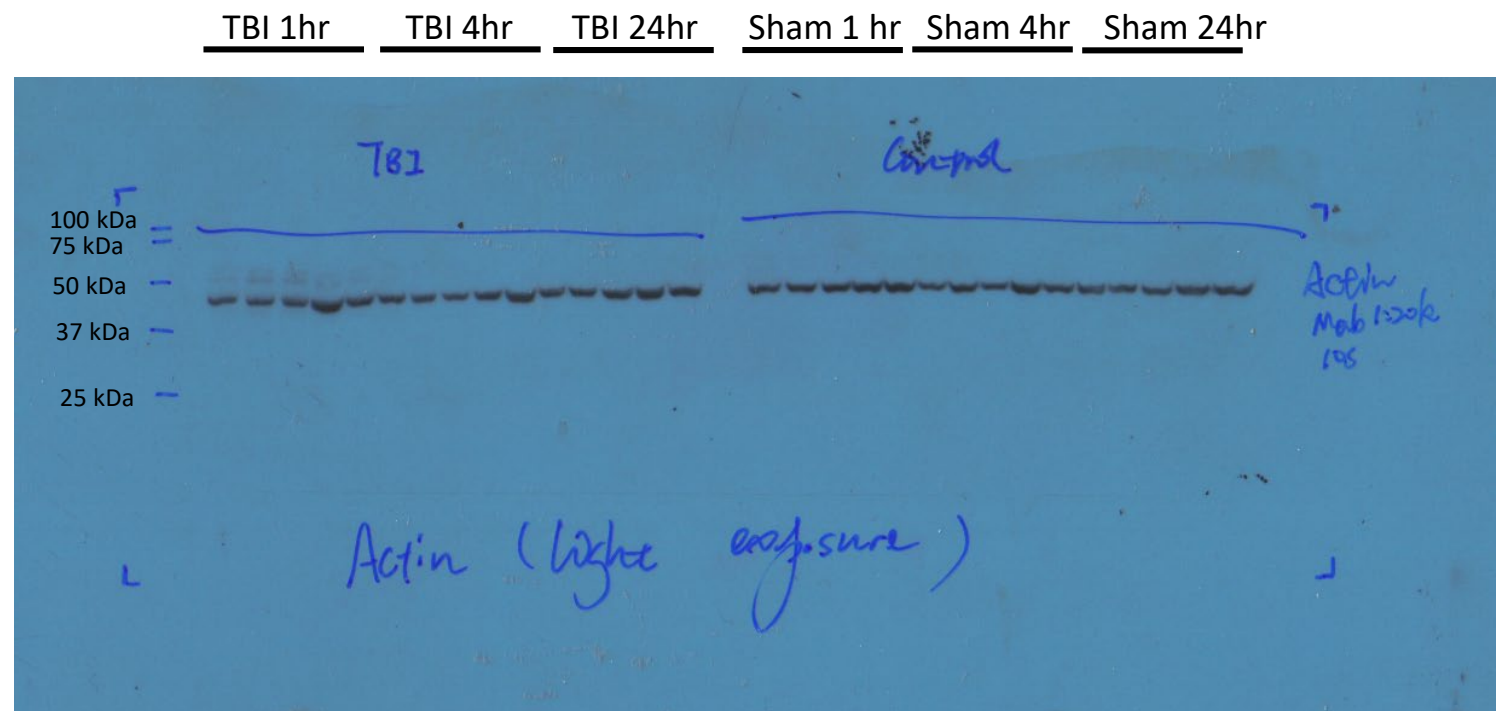

TBI 1hr   TBI 4hr   TBI 24hr   Sham 1 hr   Sham 4hr   Sham 24hr

pGSK3 $\beta$  ser9

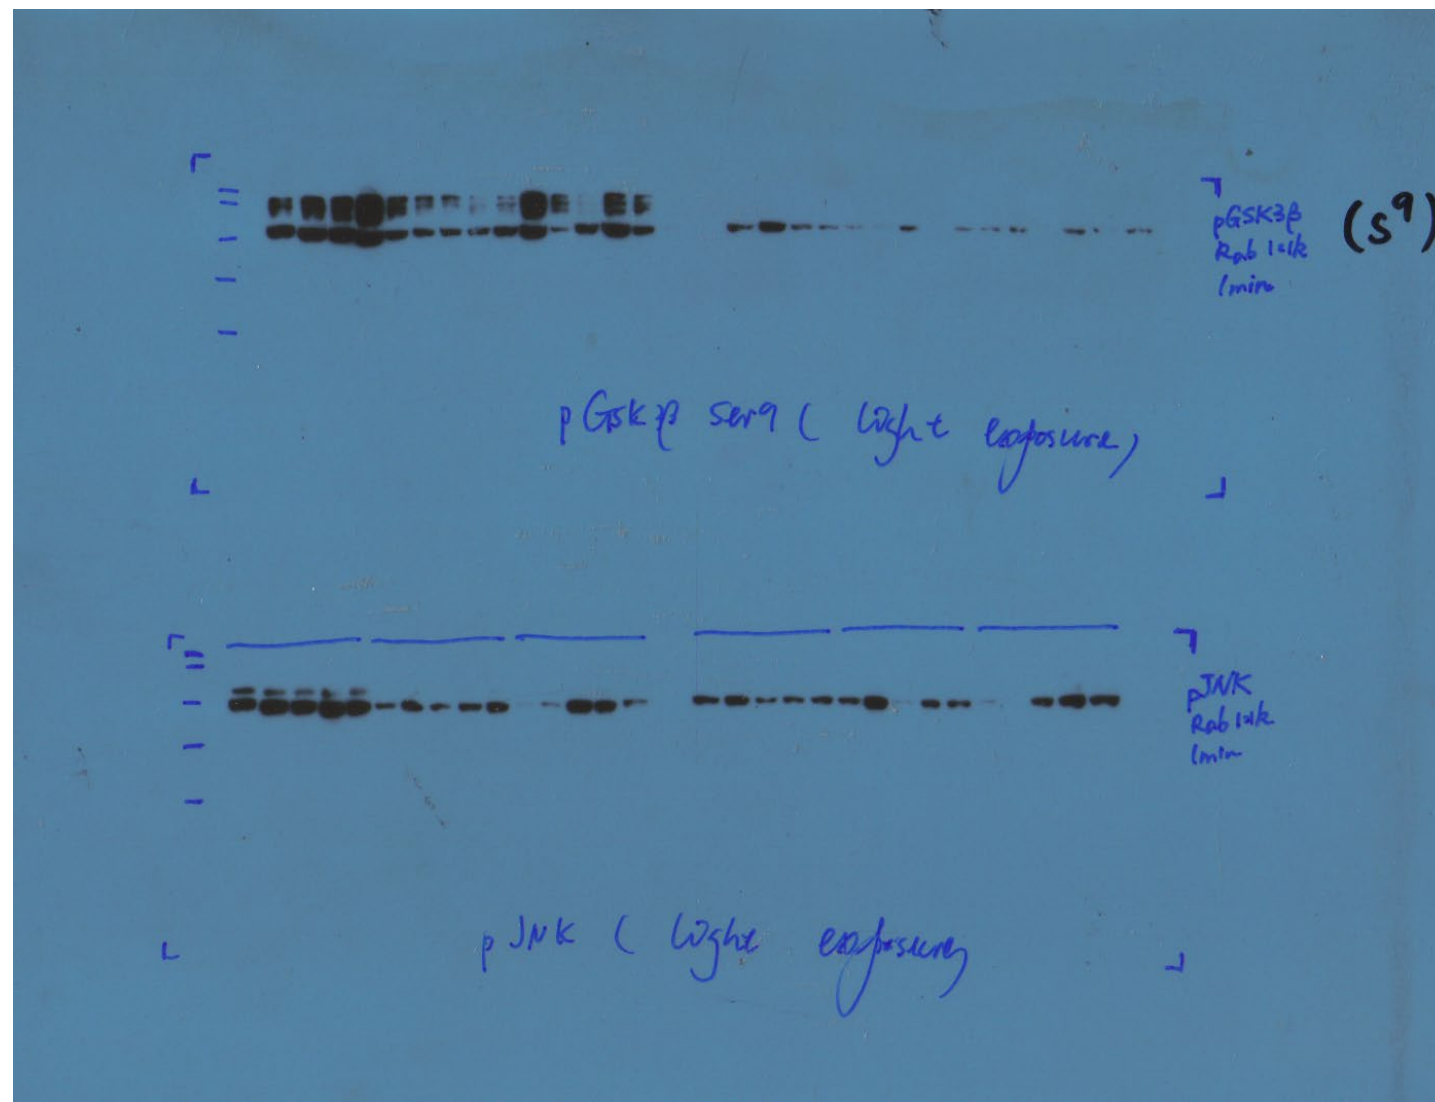

Phospho-JNK

TBI 1hr   TBI 4hr   TBI 24hr   Sham 1 hr   Sham 4hr   Sham 24hr

JNK

JNK  
Rob 1:10k  
30s

Total JNK

GSK3 $\beta$

GSK3 $\beta$   
Rob 1:10k  
30s

Total Gsk3 $\beta$

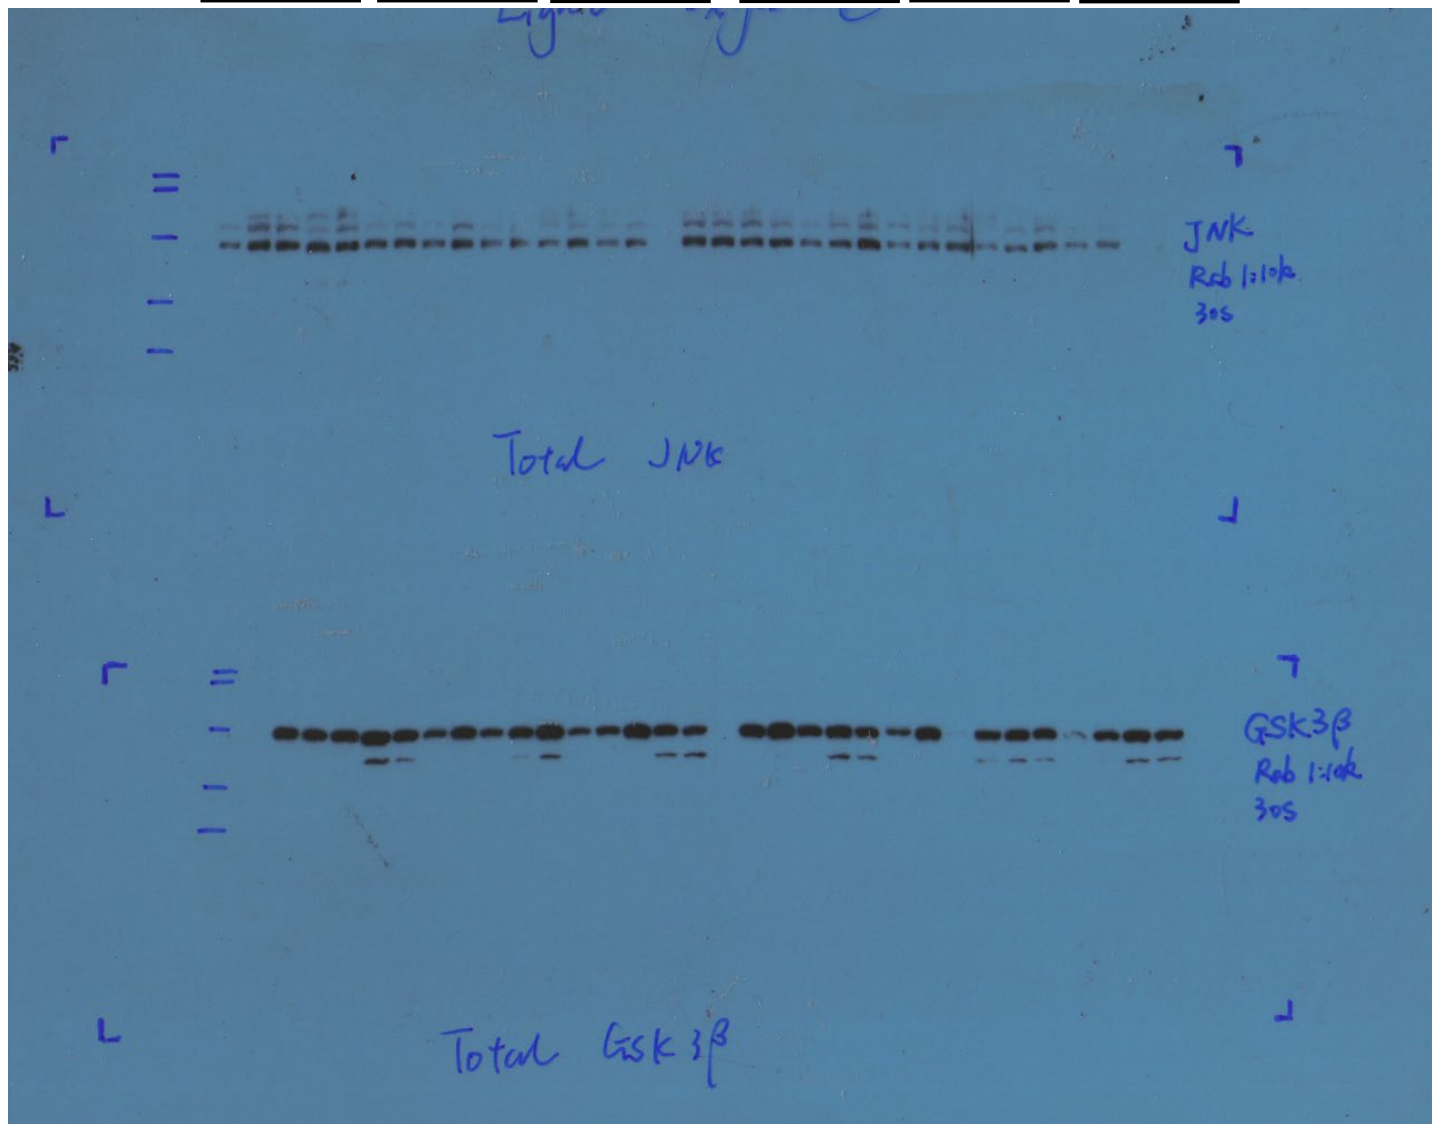

ERK

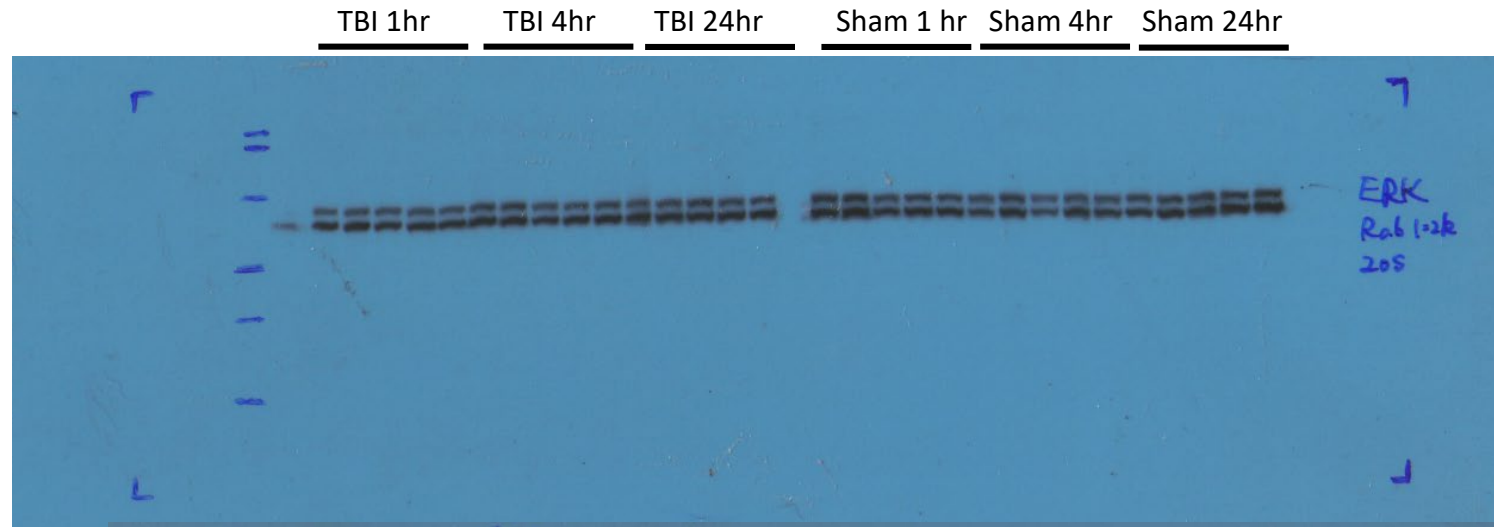

Phospho-ERK

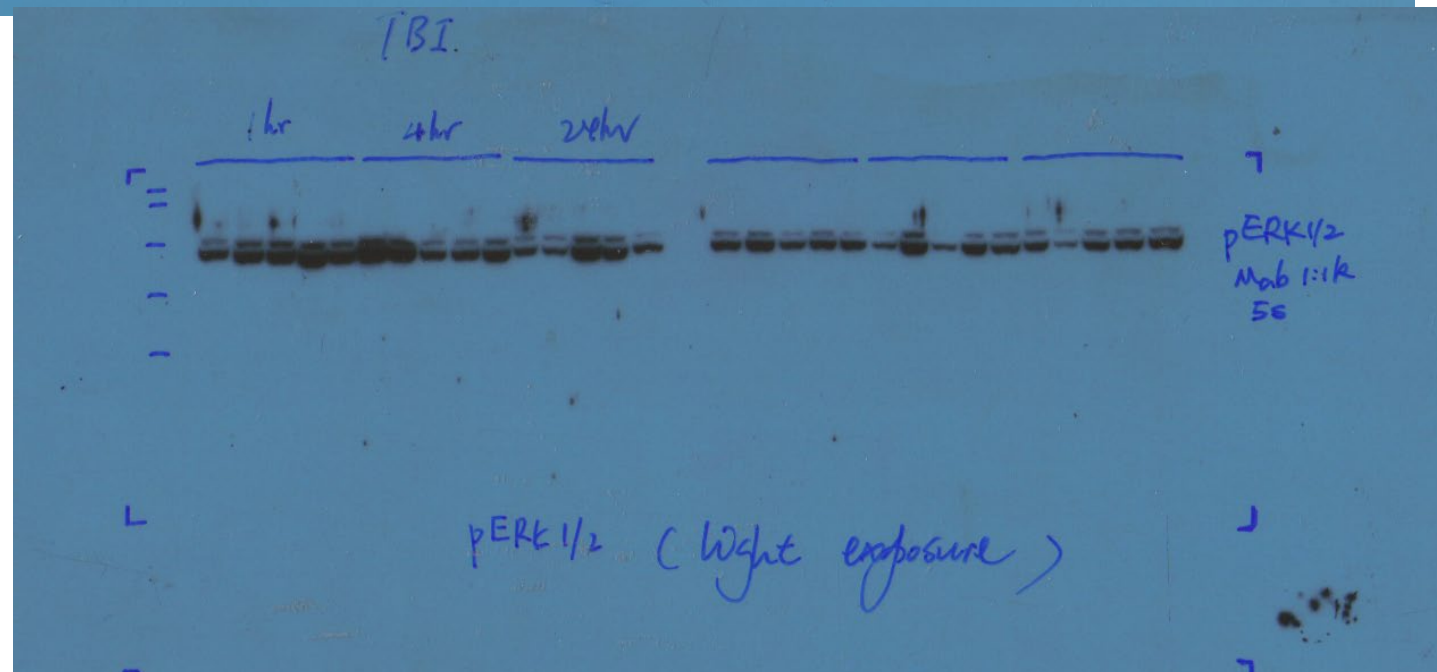

Nitrotyrosine

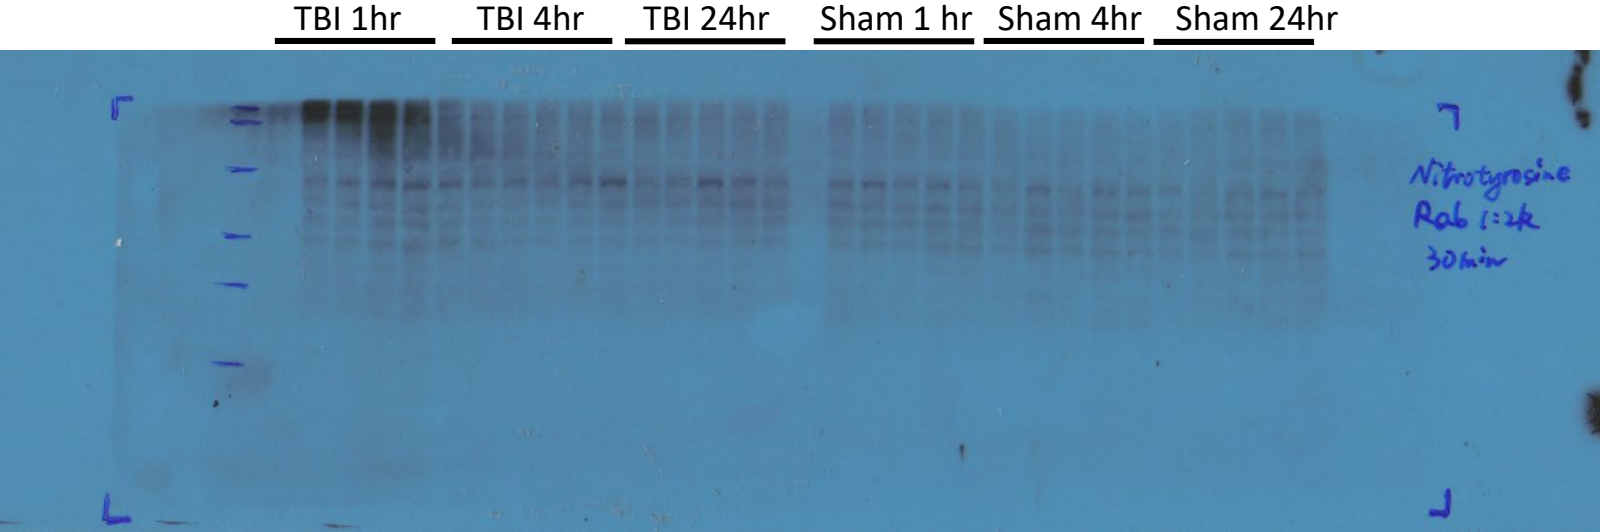

Tau5

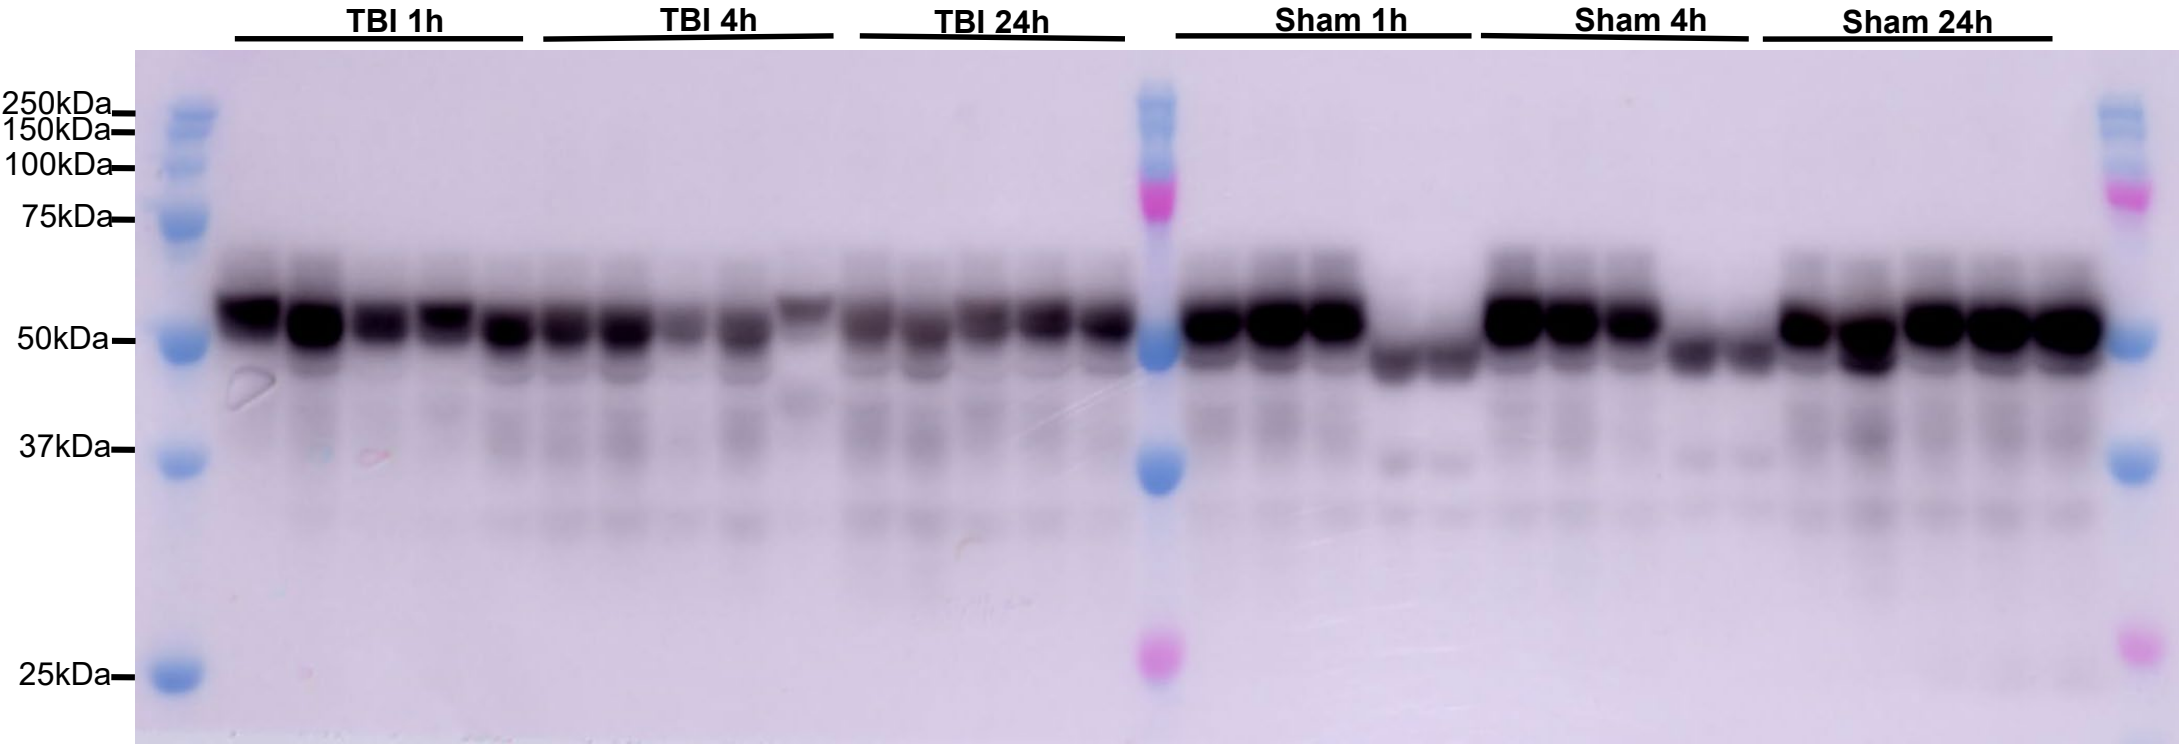



AT8

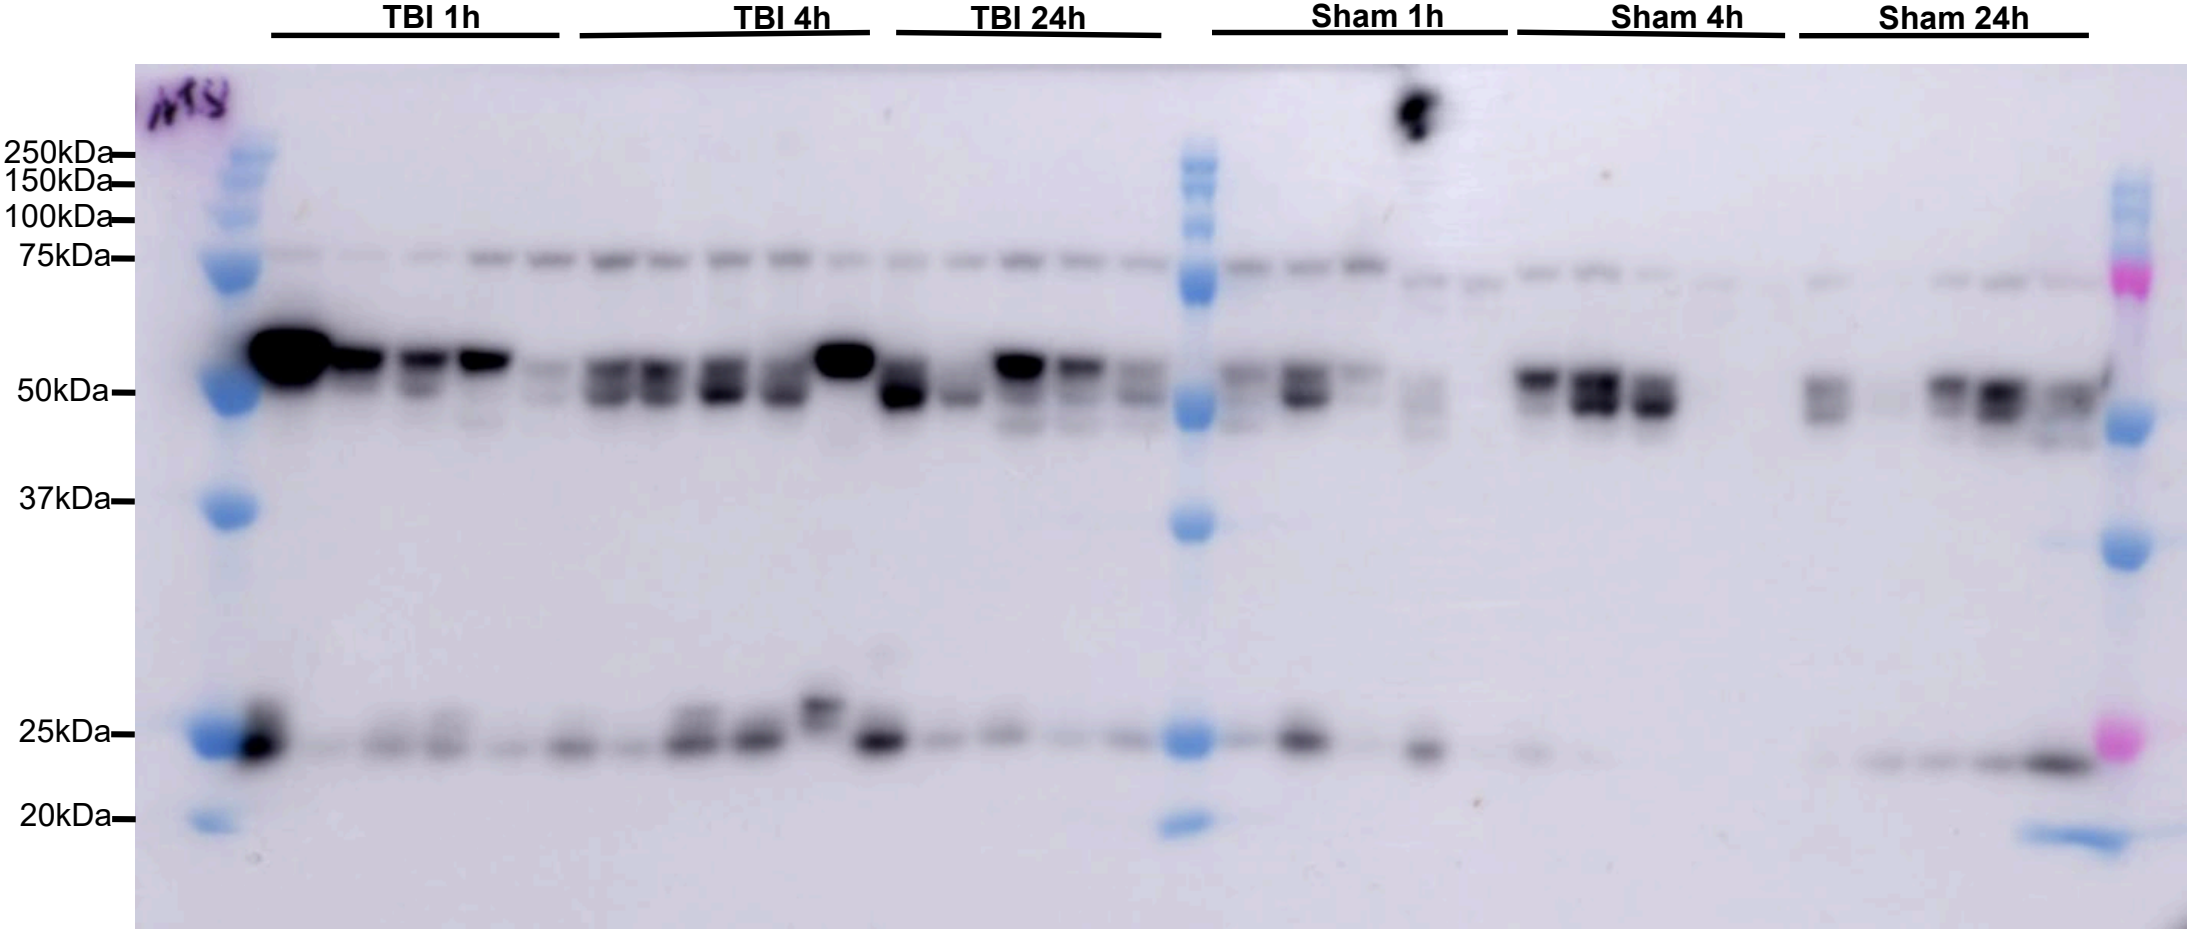



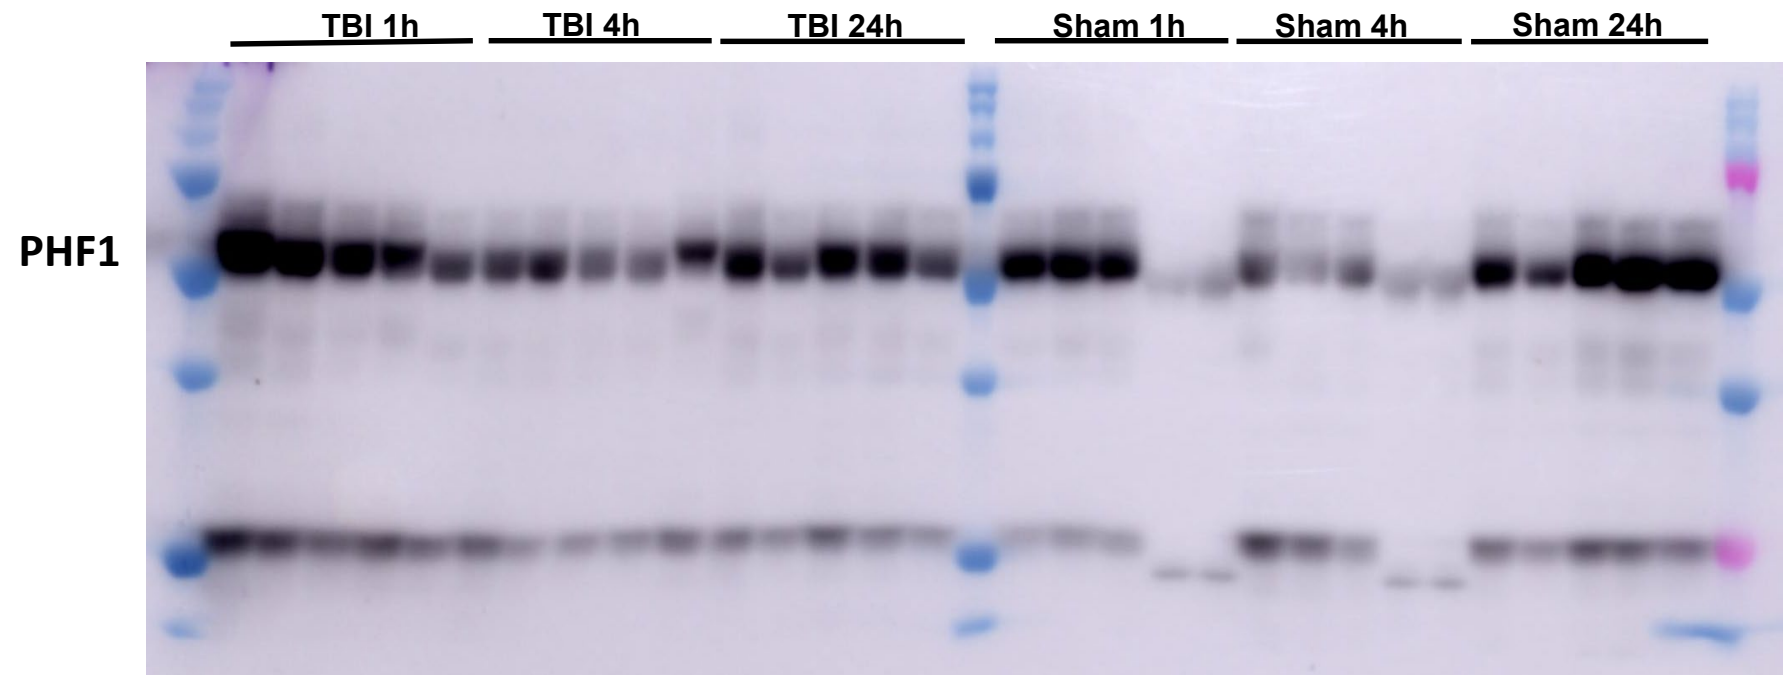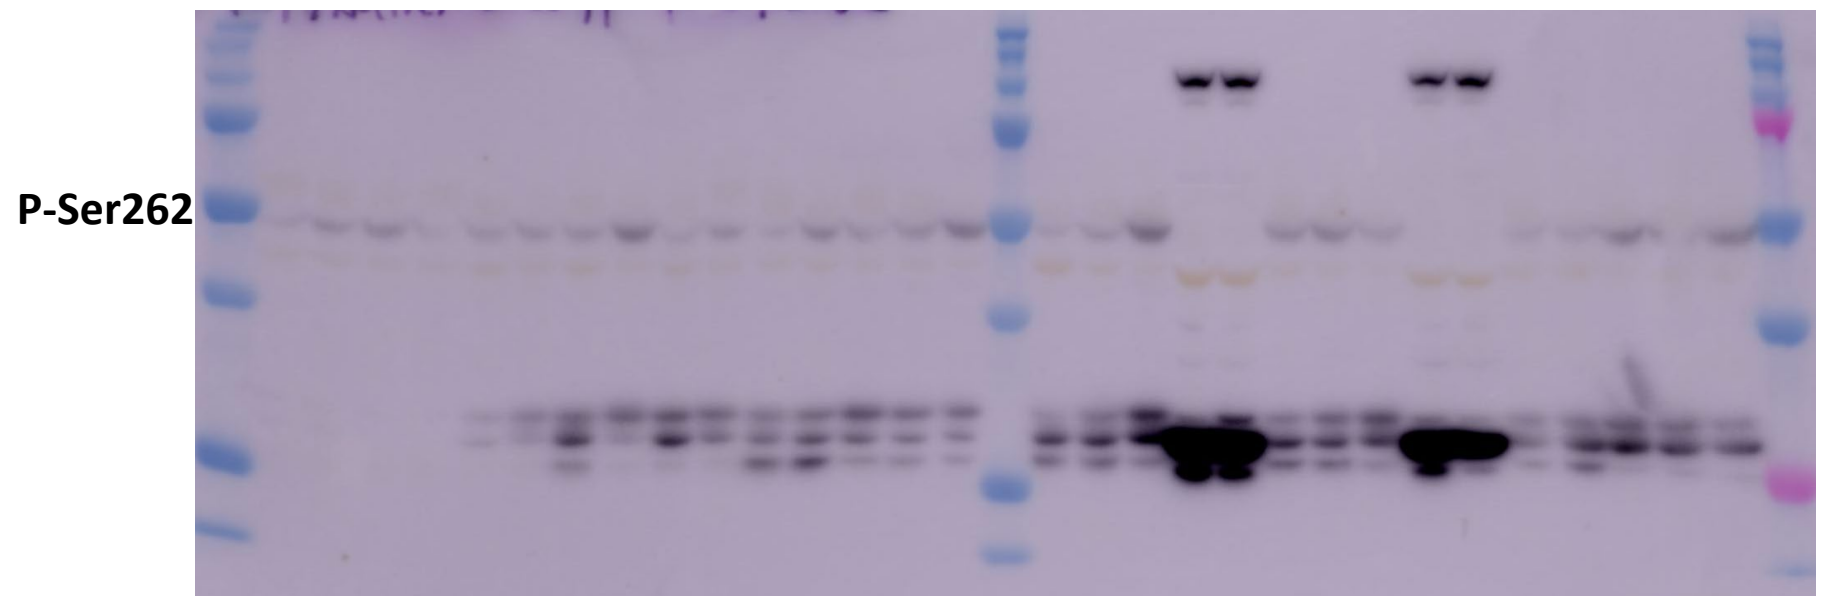

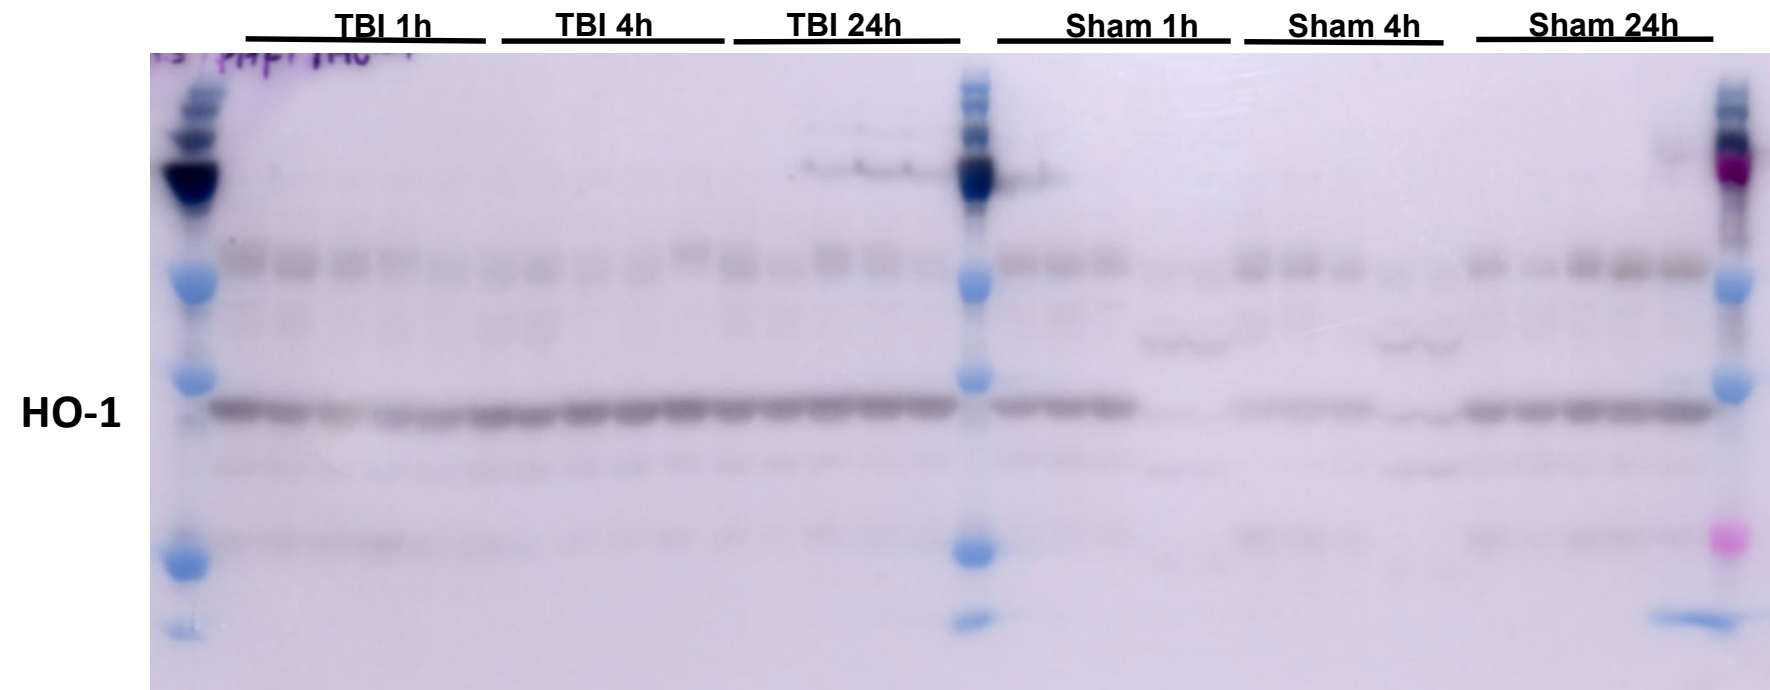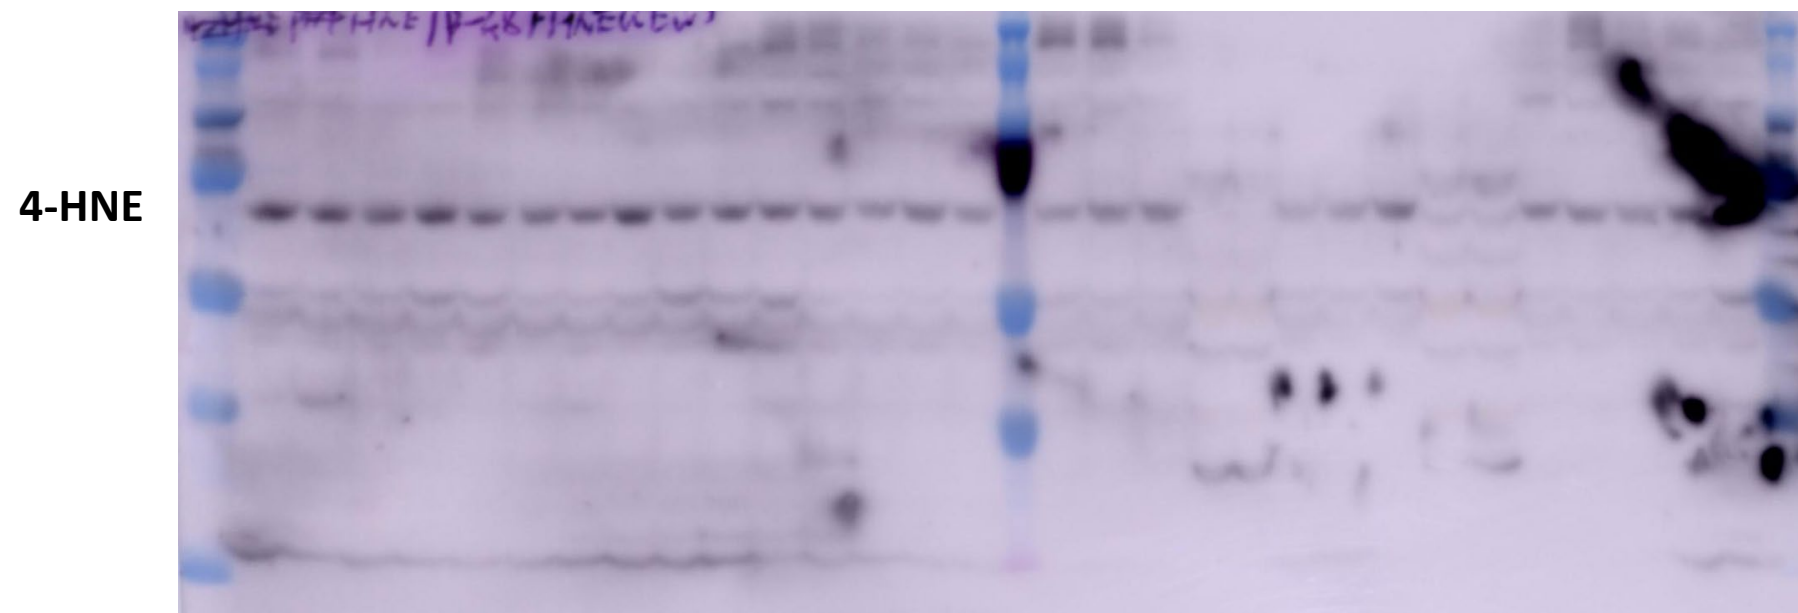

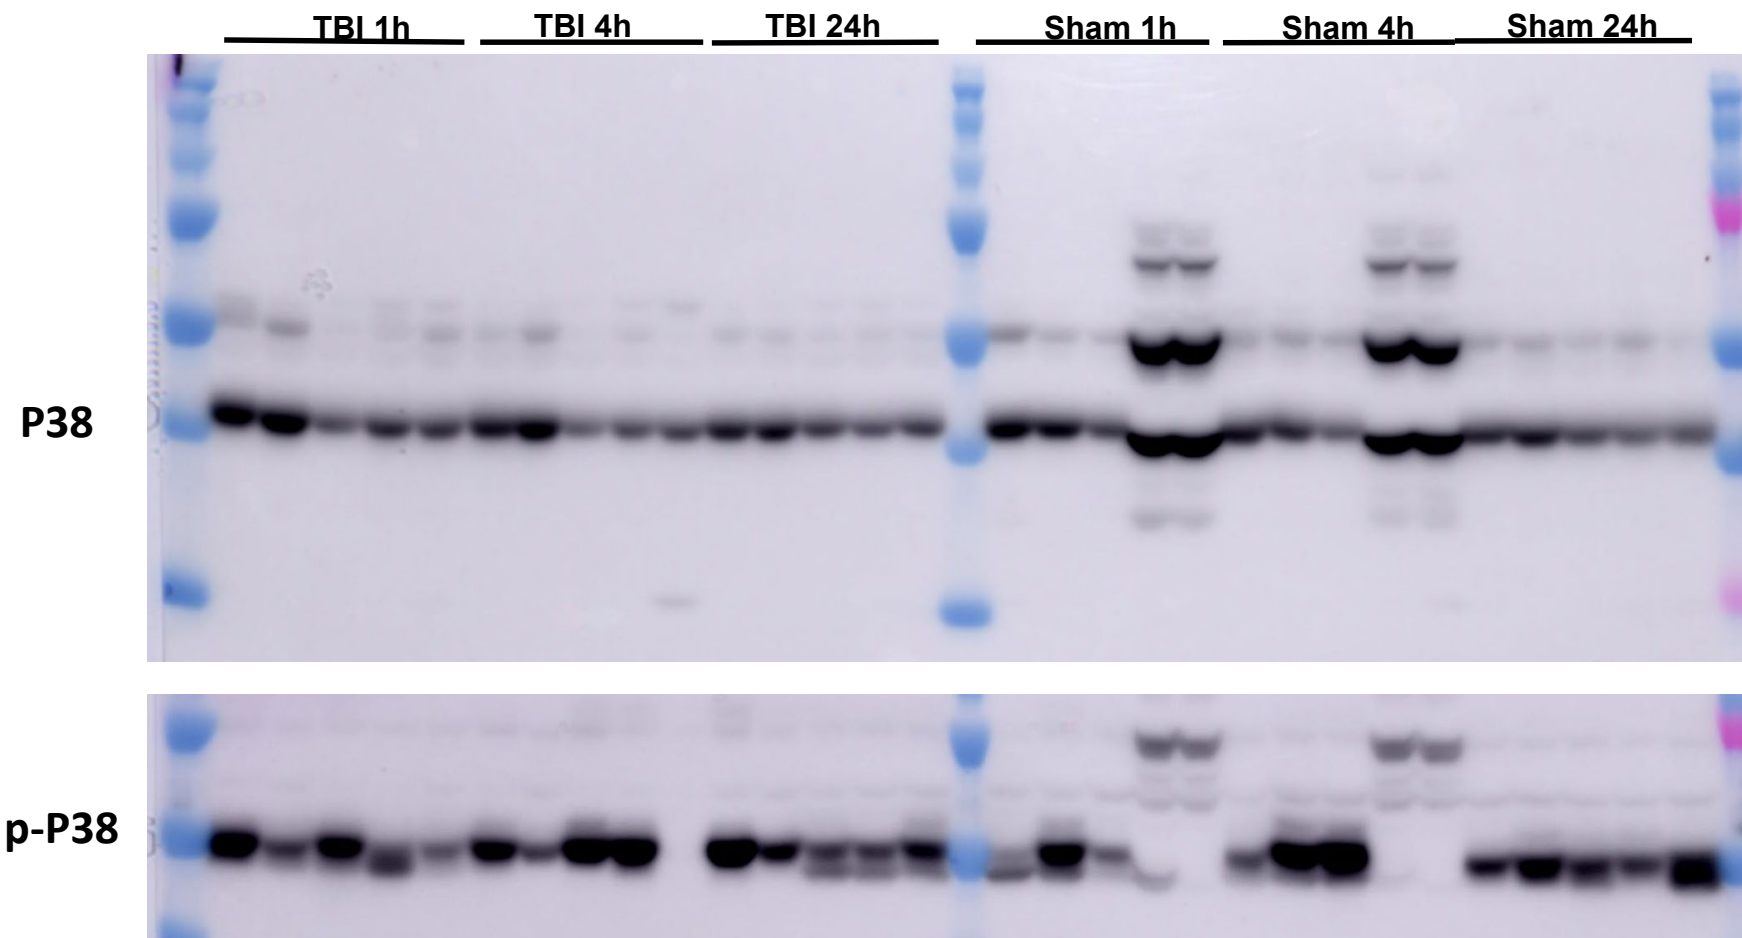

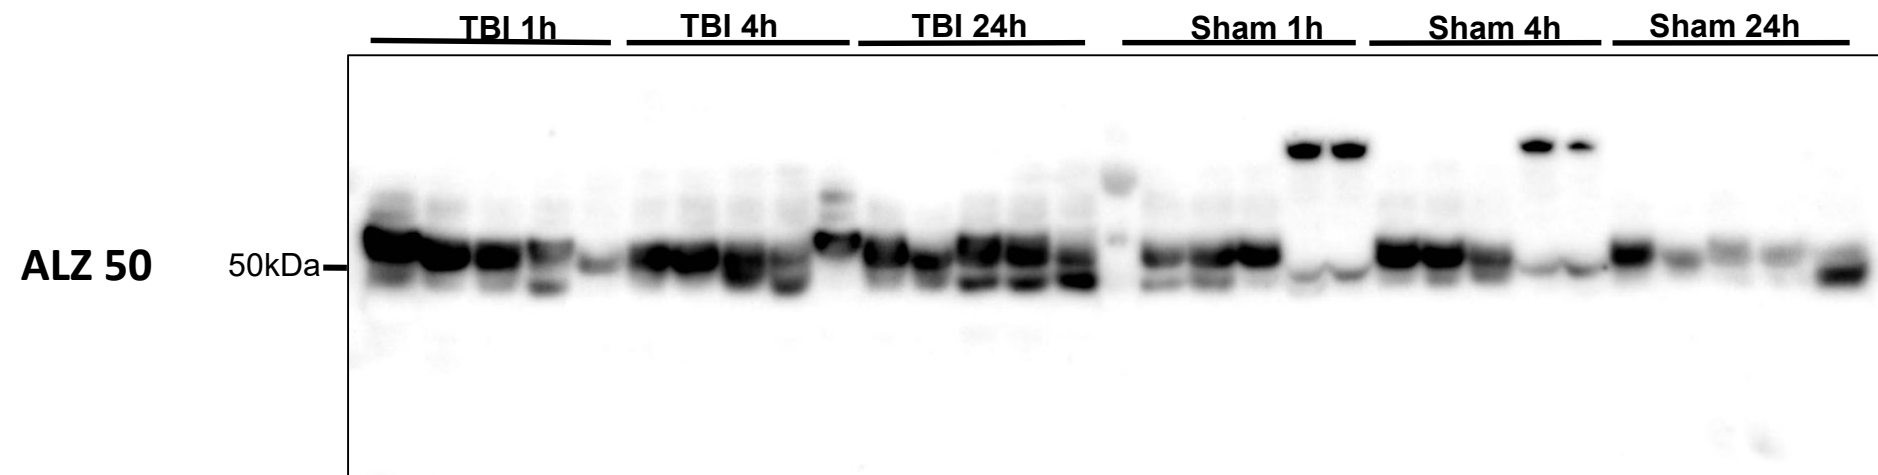

Supplement: s1 [file s1]
